# Supplementary material for: MicroRNA-27b Impairs Nrf2-Mediated Angiogenesis in the Progression of Diabetic Foot Ulcer
Source: MDPI journal article supplement (doi:10.3390/jcm12134551), 2023-07-07
Supplement: s1 [file s1]

## Supplementary Table

**Table S1.** List of primers used in this study.

| Target name                     | Primer sequence        |                       |
|---------------------------------|------------------------|-----------------------|
|                                 | Forward                | Reverse               |
| <b>miR-27b</b>                  | TTCACAGTGGCTAAGTTCTGC  |                       |
| <b>U6</b>                       | CGCAAGGATGACACGCAAATTC |                       |
| <b>Nrf2</b>                     | GACAATGAGGTTTCTTCGGCT  | CGTCTAAATCAACAGGGGCTA |
| <b>HO-1</b>                     | GGGAATTCTCTTGGCTGGCT   | AACTGAGGATGCTGAAGGGC  |
| <b>SDF-1<math>\alpha</math></b> | CGCACTTTCACCTCTCCGTCA  | AGCACGACCACGACCTTG    |
| <b>VEGF</b>                     | CTACCTCCACCATGCCAAGT   | GCAGTAGCTGCGCTGATAGA  |
| <b>GAPDH</b>                    | AAGAAGGTGGTGAAGCAGGC   | GTCAAAGGTGGAGGAGTGGG  |
